# Supplementary material
Source: PubMed Central journal article supplement (PMC4129480)
Supplement: mmc1.pdf [file mmc1.pdf]

# **CONTRIBUTION OF FLUOROPHORE DYNAMICS AND SOLVATION TO RESONANT ENERGY TRANSFER IN PROTEIN-DNA COMPLEXES: A MOLECULAR-DYNAMICS STUDY**

Massa J. Shoura,<sup>1,2</sup> R. J. K. Udayana Ranatunga,<sup>3</sup> Sarah A. Harris,<sup>5</sup> Steven O. Nielsen,<sup>3</sup> and  
Stephen D. Levene<sup>1,2,4,\*</sup>

<sup>1</sup>Departments of Bioengineering, <sup>2</sup>Molecular and Cell Biology, <sup>3</sup>Chemistry, and <sup>4</sup>Physics  
University of Texas at Dallas  
800 West Campbell Road  
Richardson, TX 75080  
USA

<sup>5</sup>Department of Physics and Astronomy  
University of Leeds  
E.C. Stoner Building  
Leeds LS2 9JT  
United Kingdom

## **Supporting Material**

**Table S1: List of systems simulated in this work**

| <b>System</b>                                            | <b>Trajectory duration, ns</b>                                                                               |
|----------------------------------------------------------|--------------------------------------------------------------------------------------------------------------|
| <b>DNA duplex in water</b>                               | W/O ATTO dyes: <b>46</b><br>W/ ATTO dyes: <b>58</b>                                                          |
| <b>DNA- Cre synapsis (5CRX) in water</b>                 | W/O ATTO dyes: <b>49</b><br>W/ ATTO dyes parallel: <b>57</b><br>W/ ATTO dyes antiparallel: <b>58</b>         |
| <b>DNA Holiday junction without Cre in water</b>         | W/O ATTO dyes: <b>60</b><br>W/ ATTO dyes scenario (I) : <b>56</b><br>W/ ATTO dyes scenario (II): <b>51</b>   |
| <b>DNA-Cre Holiday junction (3CRX) in water</b>          | W/O ATTO dyes: <b>45</b><br>W/ ATTO dyes scenario (I) : <b>54</b><br>W/ ATTO dyes scenario (II): <b>57</b>   |
| <b>DNA-Cre Holiday junction (3CRX) in water:glycerol</b> | W/ ATTO dyes scenario (II): <b>200</b>                                                                       |
| <b>Controls- Tethered dyes in water</b>                  | d= 2 nm: <b>30</b><br>d= 3 nm: <b>30</b><br>d= 4 nm: <b>30</b><br>d= 5 nm: <b>30</b><br>d= 7.3 nm: <b>30</b> |
| <b>Controls- Tethered dyes in water:glycerol</b>         | d= 2 nm: <b>100</b><br>d= 4 nm: <b>110</b><br>d= 7.3 nm: <b>100</b>                                          |

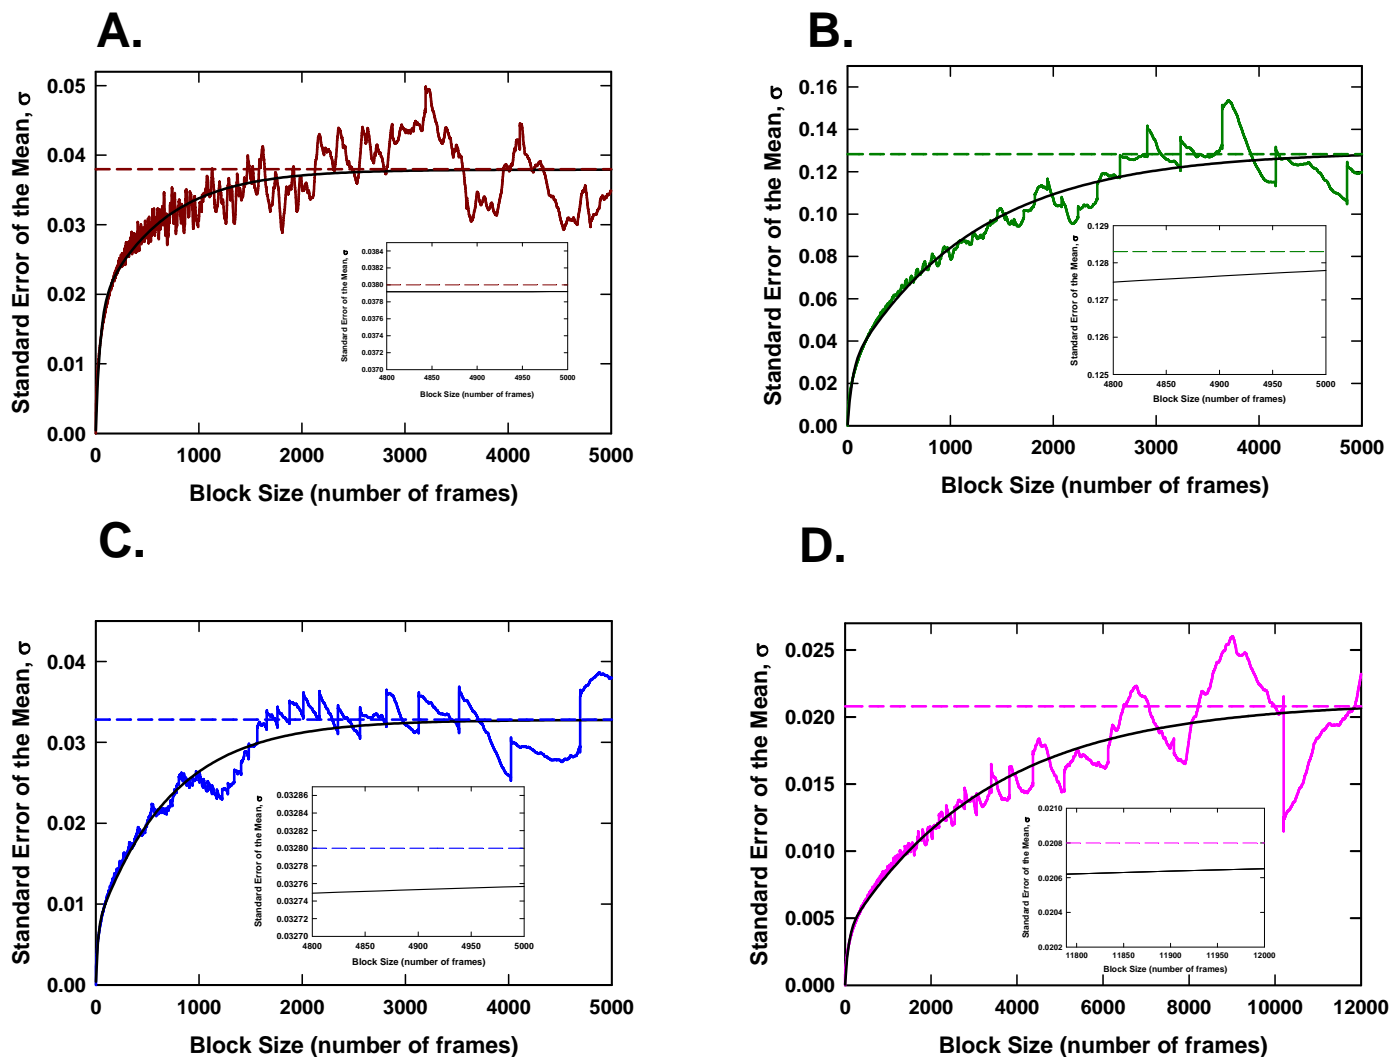

**Figure S1.** Block-averaging analysis of MD trajectories for convergence and statistical noise. The solid black lines show a mono- or bi-exponential fit to the apparent standard error,  $\sigma$ , in  $\langle \kappa^2(t) \rangle_T$  as a function of data-block size. The dashed line gives the asymptotic value of the exponential fit,  $\sigma^*$ , which corresponds to an estimated lower bound for the standard error in  $\langle \kappa^2(t) \rangle_T$  over the full trajectory. Corresponding systems are: (A.) DNA duplex (system (ii.)), (B.) antiparallel Cre-DNA synaptic complex (system (iii.)), (C.) and (D.) Cre-DNA Holliday-junction intermediate (system (iv.)) in water; and glycerol:water, respectively. Insets show the respective approaches of the fitted dependencies to their asymptotic values in the limit of large block size. The fitted values for maximum block size and corresponding asymptotic values are similar at the 1% level; although this suggests sufficient equilibration of  $\langle \kappa^2(t) \rangle_T$  to support the conclusions of this study, these trajectories are likely not long enough to supply an upper bound for  $\sigma^*$ .

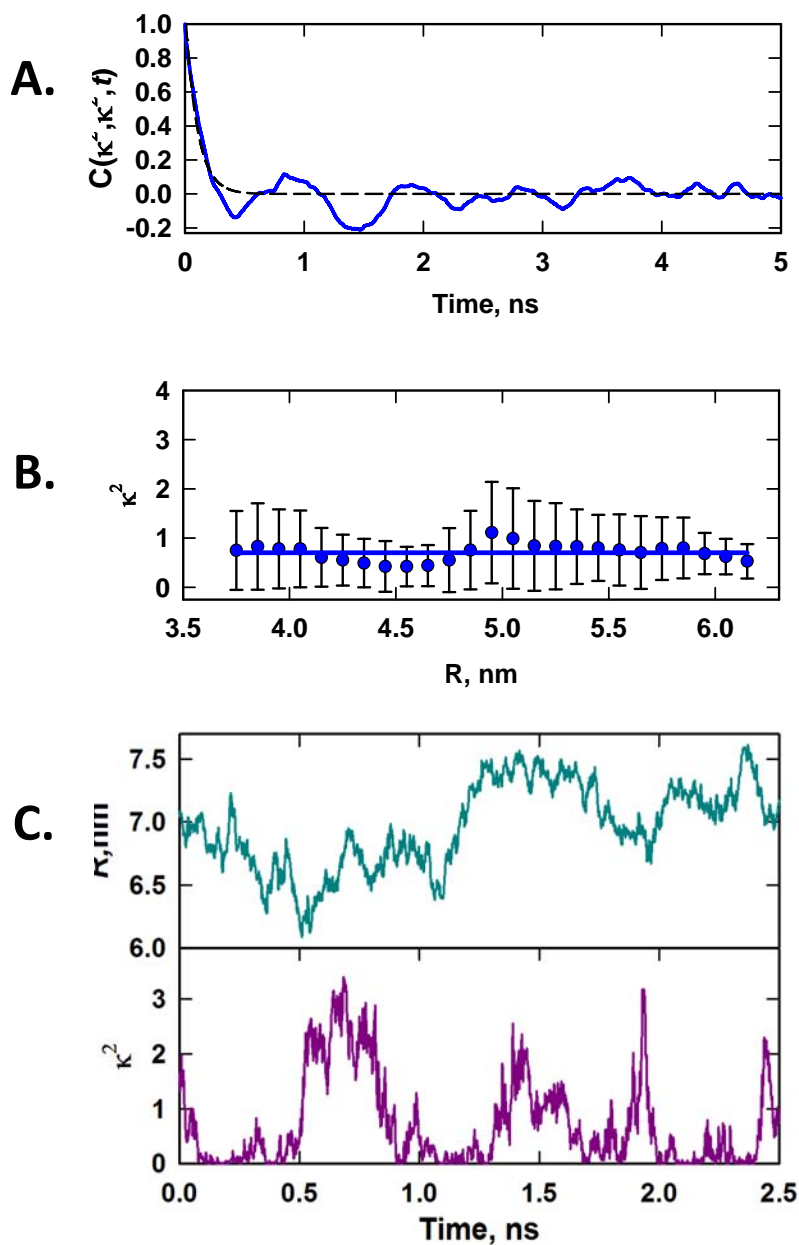

**Figure S2.** Dynamics of tethered ATTO dyes with  $d = 5$  nm; total trajectory duration was 30 ns. **(A.)** The autocorrelation function for  $\kappa^2$ ,  $C(\kappa^2, \kappa^2; \tau) = \langle \kappa^2(t) \kappa^2(t + \tau) \rangle_\tau$  (solid blue line) with a single-exponential fit (dashed black line). The decay time  $\tau$  of the fit is 100 ps. **(B.)** Binned scatter plot of  $\kappa^2$  as a function of  $R$  for the tethered dyes. The average value of  $\kappa^2$  is 0.65, shown as a solid blue line. **(C.)** Time-dependent fluctuations of the orientation factor,  $\kappa^2$  and center-of-mass distance between the dyes,  $R$ .

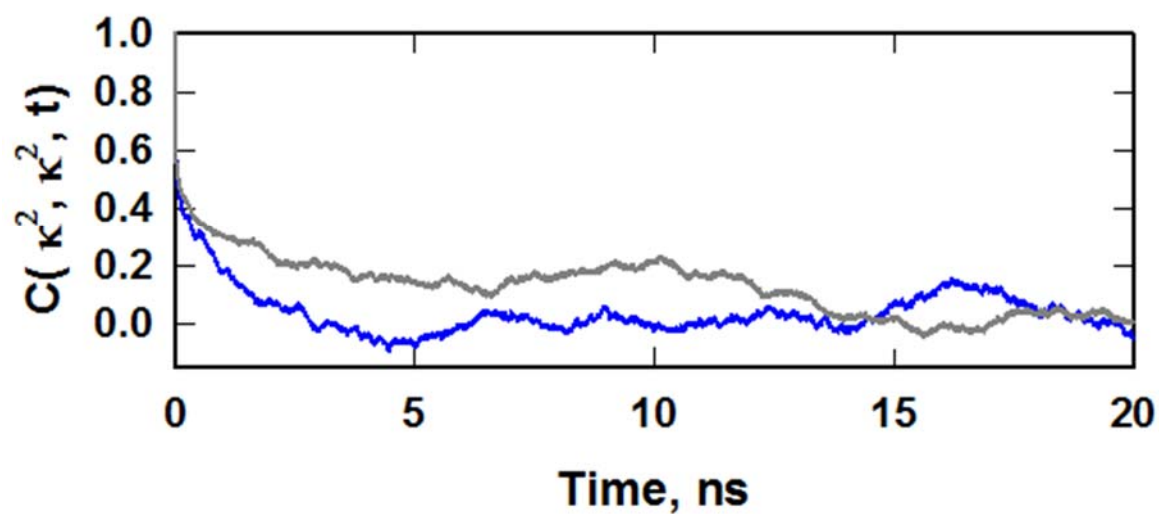

**Figure S3.** Dynamics of ATTO dyes conjugated to a Cre-DNA holliday junction complex. The autocorrelation function for  $\kappa^2$ ,  $C(\kappa^2, \kappa^2; \tau) = \langle \kappa^2(t) \kappa^2(t + \tau) \rangle_\tau$  is shown for system (iv.) in water (blue) and glycerol:water (grey). We estimate decay times of 1 ns (aqueous) and 9 ns (glycerol:water). MD trajectories for the Cre-HJ complex in water and glycerol:water were carried out for times that are more than 20 times the respective autocorrelation-decay times for  $\kappa^2$ .

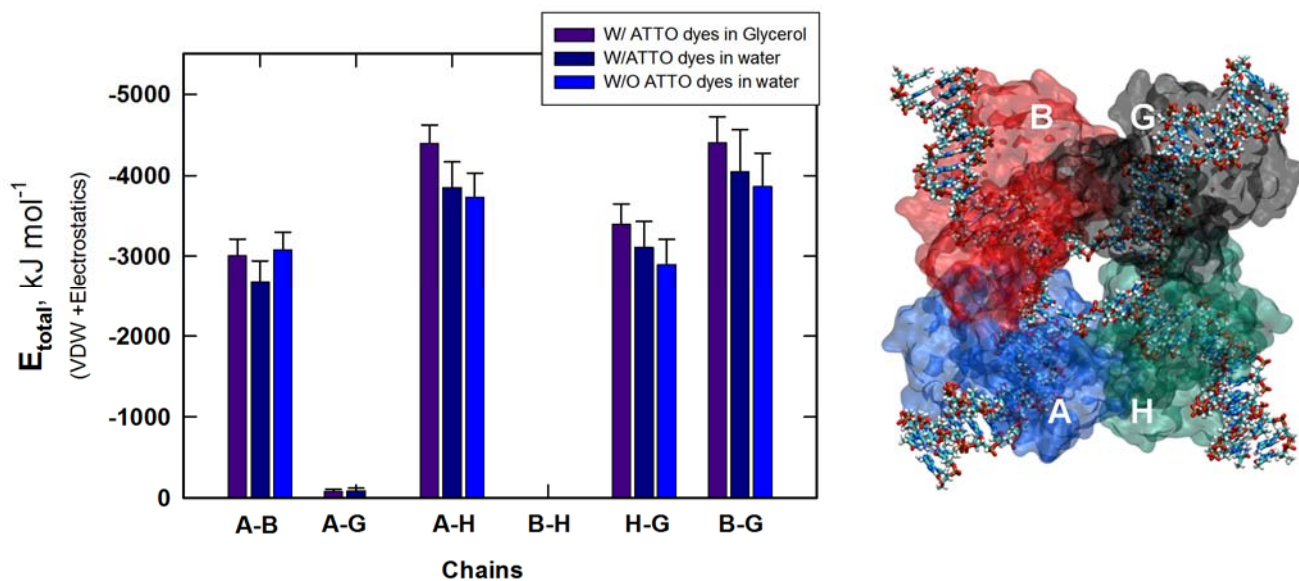

**Figure S4.** Stabilization energy of the 3CRX Cre-HJ complex. The sum of van der Waals and electrostatic components of the potential energy of interaction between Cre monomers, labeled A, B, G, and H. All energetic contributions from DNA binding, as well as DNA-DNA interactions, are excluded. Note that incorporation of ATTO dyes does not affect the stability of the complex in water. There is a small, but measurable, stabilization of protein-protein interactions in glycerol-water mixture.

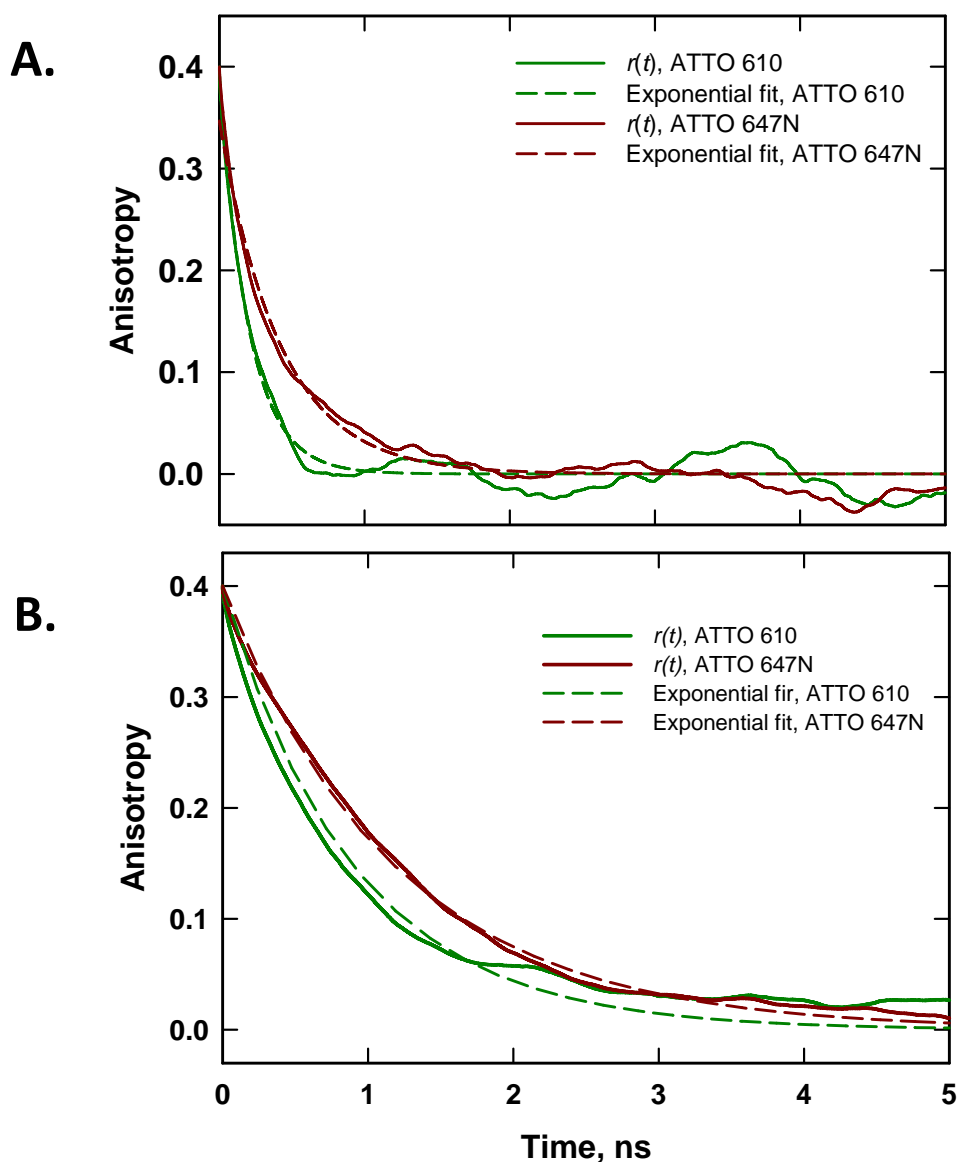

**Figure S5.** Time-dependent anisotropy,  $r(t)$ , of individual ATTO dyes. **(A.)** Simulations in aqueous-solvent conditions. Single-exponential fits yielded correlation times of 400 and 640 ps for ATTO 610 and ATTO 647N, respectively. The smaller value attributed to ATTO 610 is expected due to the smaller dimensions of the fluorophore. **(B)** Simulations in water:glycerol solvent yielded correlation times of 1.2 and 1.7 ns for ATTO 610 and ATTO 647N, respectively. The relative time constants for water:glycerol mixtures and aqueous solvent are quantitatively consistent with the increment in bulk solvent viscosity.

## Appendix: Topology Files for ATTO 647N and ATTO 610 (CHARMM Format)

```
!!!!!!!!!!!!!!!!!!!!!!!!!!!!!!!!!!!!!!!!!!!!!!!!!!!!!!!!!!!!!!!!!!!!!!!!!!!!!!
!!!! ATTO Dyes Topology file By: Massa Shoura and Udy Ranatunga 2013!!!!
!!!!!!!!!!!!!!!!!!!!!!!!!!!!!!!!!!!!!!!!!!!!!!!!!!!!!!!!!!!!!!!!!!!!!!!!!!!!!!
!!!!!!!!!!!!!!!!!!!!!!!!!!!!!!!!!!!!!!!!!!!!!!!!!!!!!!!!!!!!!!!!!!!!!!!!!!!!!!
!!!!!!!!!!!! ATTO 647N Dye molecule topology!!!!!!!!!!!!
!!!!!!!!!!!!!!!!!!!!!!!!!!!!!!!!!!!!!!!!!!!!!!!!!!!!!!!!!!!!!!!!!!!!!!!!!!!!!!
```

```
RESI A647          +1.00 !
```

```
!N and adjacent C
```

```
GROUP
```

```
ATOM C34  CA      0.000 !
```

```
GROUP
```

```
ATOM C41  CA     -0.115 !
```

```
ATOM H25  HP      0.115 !
```

```
GROUP
```

```
ATOM C40  CA      0.000 !
```

```
GROUP
```

```
ATOM C35  CA     -0.115 !
```

```
ATOM H41  HP      0.115 !
```

```
GROUP
```

```
ATOM C39  CT2    -0.18  !
```

```
ATOM H27  HA      0.09  !
```

```
ATOM H26  HA      0.09  !
```

```
GROUP
```

```
ATOM C38  CT2    -0.18  !
```

```
ATOM H29  HA      0.09  !
```

```
ATOM H28  HA      0.09  !
```

```
!delocalized N group
```

```
GROUP
```

```
! 1st N and its neighbors
```

```
ATOM N4   N3R    -0.506 !      ESP charge optimized
```

```
ATOM C37  CT      0.558 !      ESP charge optimized
```

```
ATOM C46  CT2     0.147 !      ESP charge optimized
```

```
ATOM H40  HA      0.09  !
```

```
ATOM H42  HA      0.09  !
```

```
ATOM C36  CA      0.434 !      ESP charge optimized
```

```
! 2nd N+ and its neighbors
```

```
ATOM N5   NRA    -0.067 !      ESP charge optimized
```

```
ATOM C27  CT2     0.030 !      ESP charge optimized
```

```
ATOM H52  HA      0.09  !
```

```
ATOM H53  HA      0.09  !
```

```
ATOM C43  CA      0.077 !      ESP charge optimized
```

```
ATOM C28  CT2    -0.223 !      ESP charge optimized
```

```
ATOM H54  HA      0.09  !
```

```
ATOM H55  HA      0.09  !
```

```
GROUP
```

```
ATOM C49  CT3    -0.27  !
```

```
ATOM H31  HA      0.09  !
```

```
ATOM H32  HA      0.09  !
```



|          |     |       |   |
|----------|-----|-------|---|
| ATOM H33 | HA  | 0.09  | ! |
| GROUP    |     |       | ! |
| ATOM C48 | CT3 | -0.27 | ! |
| ATOM H34 | HA  | 0.09  | ! |
| ATOM H35 | HA  | 0.09  | ! |
| ATOM H36 | HA  | 0.09  | ! |
| GROUP    |     |       | ! |
| ATOM C47 | CT3 | -0.27 | ! |
| ATOM H37 | HA  | 0.09  | ! |
| ATOM H38 | HA  | 0.09  | ! |
| ATOM H39 | HA  | 0.09  | ! |

|          |     |       |   |
|----------|-----|-------|---|
| !RING    |     |       |   |
| GROUP    |     |       | ! |
| ATOM C26 | CE1 | -0.15 | ! |
| ATOM C25 | CE1 | -0.15 | ! |
| ATOM H51 | HE1 | 0.15  | ! |
| ATOM H50 | HE1 | 0.15  | ! |

|          |     |       |   |
|----------|-----|-------|---|
| !RING    |     |       |   |
| GROUP    |     |       | ! |
| ATOM C30 | CT2 | -0.18 | ! |
| ATOM H59 | HA  | 0.09  | ! |
| ATOM H58 | HA  | 0.09  | ! |
| GROUP    |     |       | ! |
| ATOM C29 | CT2 | -0.18 | ! |
| ATOM H56 | HA  | 0.09  | ! |
| ATOM H57 | HA  | 0.09  | ! |

|          |    |        |   |
|----------|----|--------|---|
| !RING    |    |        |   |
| GROUP    |    |        | ! |
| ATOM C23 | CA | -0.115 | ! |
| ATOM H49 | HP | 0.115  | ! |
| GROUP    |    |        | ! |
| ATOM C24 | CA | 0.000  | ! |
| GROUP    |    |        | ! |
| ATOM C31 | CA | 0.000  | ! |

|          |     |       |   |
|----------|-----|-------|---|
| !RING    |     |       |   |
| GROUP    |     |       | ! |
| ATOM C42 | CA  | 0.000 | ! |
| GROUP    |     |       | ! |
| ATOM C33 | CT  | 0.000 | ! |
| GROUP    |     |       | ! |
| ATOM C32 | CA  | 0.000 | ! |
| GROUP    |     |       | ! |
| ATOM C22 | CA  | 0.000 | ! |
| GROUP    |     |       | ! |
| ATOM C21 | CA  | 0.000 | ! |
| GROUP    |     |       | ! |
| ATOM C44 | CT3 | -0.27 | ! |
| ATOM H46 | HA  | 0.09  | ! |
| ATOM H47 | HA  | 0.09  | ! |
| ATOM H48 | HA  | 0.09  | ! |
| GROUP    |     |       | ! |

|                   |     |        |   |               |
|-------------------|-----|--------|---|---------------|
| ATOM C45          | CT3 | -0.27  | ! |               |
| ATOM H43          | HA  | 0.09   | ! |               |
| ATOM H44          | HA  | 0.09   | ! |               |
| ATOM H45          | HA  | 0.09   | ! |               |
|                   |     |        |   |               |
| !RING             |     |        |   |               |
| GROUP             |     |        | ! |               |
| ATOM C16          | CA  | -0.115 | ! |               |
| ATOM H20          | HP  | 0.115  | ! |               |
| GROUP             |     |        | ! |               |
| ATOM C17          | CA  | -0.115 | ! |               |
| ATOM H21          | HP  | 0.115  | ! |               |
| GROUP             |     |        | ! |               |
| ATOM C18          | CA  | -0.115 | ! |               |
| ATOM H22          | HP  | 0.115  | ! |               |
| GROUP             |     |        | ! |               |
| ATOM C19          | CA  | -0.115 | ! |               |
| ATOM H23          | HP  | 0.115  | ! |               |
| GROUP             |     |        | ! |               |
| ATOM C15          | CA  | 0.000  | ! |               |
| GROUP             |     |        | ! |               |
| ATOM C20          | CA  | 0.000  | ! |               |
| GROUP             |     |        | ! |               |
| ATOM C14          | CC  | 0.55   | ! |               |
| ATOM O3           | O   | -0.55  | ! |               |
| GROUP             |     |        | ! |               |
| ATOM N3           | N   | -0.29  | ! | -PRO          |
| !ATOM HN3         | H   | 0.31   | ! |               |
| ATOM C50          | CT3 | 0.02   | ! |               |
| ATOM H60          | HA  | 0.09   | ! |               |
| ATOM H61          | HA  | 0.09   | ! |               |
| ATOM H62          | HA  | 0.09   | ! | /             |
| GROUP             |     |        |   |               |
| ATOM C13          | CT2 | -0.18  | ! |               |
| ATOM H18          | HA  | 0.09   | ! |               |
| ATOM H19          | HA  | 0.09   | ! |               |
|                   |     |        |   |               |
| ! BUTANAL PENDANT |     |        |   |               |
| GROUP             |     |        | ! |               |
| ATOM C12          | CT2 | -0.18  | ! |               |
| ATOM H16          | HA  | 0.09   | ! |               |
| ATOM H17          | HA  | 0.09   | ! |               |
| GROUP             |     |        | ! |               |
| ATOM C11          | CT2 | -0.18  | ! |               |
| ATOM H24          | HA  | 0.09   | ! |               |
| ATOM H15          | HA  | 0.09   | ! |               |
| GROUP             |     |        | ! |               |
| ATOM C10          | CC  | 0.55   | ! |               |
| ATOM O2           | O   | -0.55  | ! |               |
|                   |     |        |   |               |
| !LINKER           |     |        |   |               |
| GROUP             |     |        | ! |               |
| ATOM N2           | NH2 | -0.47  | ! | -ALAD residue |
| ATOM HN2          | H   | 0.31   | ! |               |

|            |     |       |     |     |                             |
|------------|-----|-------|-----|-----|-----------------------------|
| ATOM C9    | CT2 | -0.02 | !   |     |                             |
| ATOM H14   | HA  | 0.09  | !   |     |                             |
| ATOM H13   | HA  | 0.09  | !   | _/  |                             |
| GROUP      |     |       | !   |     |                             |
| ATOM C8    | CT2 | -0.18 | !   |     |                             |
| ATOM H11   | HA  | 0.09  | !   |     |                             |
| ATOM H12   | HA  | 0.09  | !   |     |                             |
| GROUP      |     |       | !   |     |                             |
| ATOM C7    | CT2 | -0.18 | !   |     |                             |
| ATOM H9    | HA  | 0.09  | !   |     |                             |
| ATOM H10   | HA  | 0.09  | !   |     |                             |
| GROUP      |     |       | !   |     |                             |
| ATOM C6    | CT2 | -0.18 | !   |     |                             |
| ATOM H7    | HA  | 0.09  | !   |     |                             |
| ATOM H8    | HA  | 0.09  | !   |     |                             |
| GROUP      |     |       | !   |     |                             |
| ATOM C5    | CT2 | -0.18 | !   |     |                             |
| ATOM H5    | HA  | 0.09  | !   |     |                             |
| ATOM H6    | HA  | 0.09  | !   |     |                             |
| GROUP      |     |       | !   |     |                             |
| ATOM C4    | CT2 | -0.01 | !   |     | -ALAD residue               |
| ATOM H3    | HA  | 0.09  | !   |     |                             |
| ATOM H4    | HA  | 0.09  | !   |     |                             |
| ATOM N1    | NH2 | -0.47 | !   |     |                             |
| ATOM HN1   | H   | 0.31  | !   | _/  |                             |
| GROUP      |     |       | !   |     |                             |
| ATOM C3    | CC  | 0.55  | !   |     |                             |
| ATOM O1    | O   | -0.55 | !   |     |                             |
| GROUP      |     |       | !   |     |                             |
| ATOM C1    | CE1 | -0.15 | !   |     | -PRPE residues              |
| ATOM C2    | CE1 | -0.15 | !   |     |                             |
| ATOM H1    | HE1 | 0.15  | !   |     |                             |
| ATOM H2    | HE1 | 0.15  | !   | _/  |                             |
|            |     |       |     |     |                             |
| DOUBLE C1  | C2  |       |     |     | !                           |
| DOUBLE C3  | O1  |       |     |     | !                           |
| DOUBLE C14 | O3  |       |     |     | !                           |
| DOUBLE C10 | O2  |       |     |     | !                           |
|            |     |       |     |     |                             |
| BOND C1    | H1  |       |     |     | !                           |
| BOND C2    | H2  |       |     |     | !                           |
| BOND C2    | C3  | C3    | N1  | N1  | HN1 N1 C4 C4 H3 C4 H4       |
| BOND C4    | C5  | C5    | H5  | C5  | H6 C5 C6 C6 H7 C6 H8        |
| !BOND C7   | C6  | C7    | H9  | C7  | H10 C7 C8 H11 C8 H12        |
| !BOND C8   | C9  | C9    | N2  | N2  | HN2 N2 C10                  |
| BOND C6    | C7  | C7    | C8  | C8  | C9 C9 N2 N2 C10             |
| BOND C7    | H9  | C7    | H10 |     |                             |
| BOND N2    | HN2 | C8    | H11 | C8  | H12 C9 H13 C9 H14           |
| BOND C10   | C11 | C11   | H24 | C11 | H15 C11 C12 C12 H16 C12 H17 |
| BOND C12   | C13 | C13   | H18 | C13 | H19 C13 N3 N3 C50 N3 C14    |
| BOND C50   | H60 | C50   | H61 | C50 | H62                         |
| BOND C14   | C15 | C15   | C16 | C16 | H20 C16 C17 C17 H21 C17 C18 |
| BOND C18   | H22 | C18   | C19 | C19 | H23 C19 C20 C20 C15 C20 C21 |
| BOND C21   | C22 | C22   | C23 | C23 | H49 C23 C24 C24 C43 C43 C31 |

```

BOND C31 C32 C32 C22 C21 C42 C42 C34 C34 C33 C33 C32 !
BOND C33 C45 C33 C44
!
BOND C45 H43 C45 H44 C45 H45 C44 H46 C44 H47 C44 H48 !
BOND C24 C25 C25 H50 C25 C26 C26 H51 C26 C27 !
BOND C27 H52 C27 H53 C27 N5 N5 C28 N5 C43 !
BOND C28 H54 C28 H55 C28 C29
!
BOND C29 H56 C29 H57 C29 C30
!
BOND C30 H58 C30 H59 C30 C31
!
BOND C47 H37 C47 H38 C47 H39 C47 C46
BOND C46 H42 C46 H40 C46 N4 N4 C37
BOND C48 H34 C48 H35 C48 H36 C48 C37
BOND C49 H31 C49 H32 C49 H33 C49 C37
BOND C38 H28 C38 H29 C37 C38 C38 C39
BOND C39 H26 C39 H27 C39 C40 C40 C36
BOND C36 N4 C36 C35 C35 H41 C35 C34
BOND C41 C40 C41 C42 C41 H25

```

```

PRES LNK2 -0.00 ! patch for linking ATTO 647N to THY C5M
!

```

```

GROUP !
ATOM 2N1 NN2B -0.34 !
ATOM 2C6 CN3 0.17 !
ATOM 2H6 HN3 0.17 !
ATOM 2C2 CN1T 0.51 !
ATOM 2O2 ON1 -0.41 !
ATOM 2N3 NN2U -0.46 !
ATOM 2H3 HN2 0.36 !
ATOM 2C4 CN1 0.50 !
ATOM 2O4 ON1 -0.45 !
ATOM 2C5 CN3T -0.15 !
ATOM 2C5M CN9 -0.04 !
ATOM 2H52 HN9 0.07 !
ATOM 2H53 HN9 0.07 !
BOND 1C1 2C5M
DELETE ATOM 2H51

```

```

!!!!!!!!!!!!!!!!!!!!!!!!!!!!!!!!!!!!!!!!!!!!!!!!!!!!!!!!!!!!!!!!!!!!!!!!!!!!
!!!!!!!!!!!! ATTO 610 Dye molecule topology!!!!!!!!!!!!!!!!!!!!
!!!!!!!!!!!!!!!!!!!!!!!!!!!!!!!!!!!!!!!!!!!!!!!!!!!!!!!!!!!!!!!!!!!!!!!!!!!!

```

```

RESI A610 +1.00 ! topology of ATTO-610 dye
! Massa Shoura Oct 21st 2011
! updated, June 27, 2012 MS

```

```

!N and adjacent C
GROUP
ATOM C19 CT3 -0.161 ! -0.171 ! ESP charge optimized
ATOM H13 HA 0.09 !
ATOM H14 HA 0.09 !
ATOM H15 HA 0.09 !

```

|          |     |        |   |        |   |                      |
|----------|-----|--------|---|--------|---|----------------------|
| ATOM C18 | CT3 | -0.179 | ! | -0.189 | ! | ESP charge optimized |
| ATOM H10 | HA  | 0.09   | ! |        |   |                      |
| ATOM H11 | HA  | 0.09   | ! |        |   |                      |
| ATOM H12 | HA  | 0.09   | ! |        |   |                      |
| ATOM N1  | NRA | -0.090 | ! | -0.100 | ! | ESP charge optimized |
| ATOM C15 | CA  | 0.497  | ! | 0.487  | ! | ESP charge optimized |
| ATOM C3  | CA  | 0.333  | ! | 0.323  | ! | ESP charge optimized |
| ATOM N2  | N3R | -0.044 | ! | -0.054 | ! | ESP charge optimized |
| ATOM C7  | CT2 | -0.060 | ! | -0.070 | ! | ESP charge optimized |
| ATOM H39 | HA  | 0.09   | ! |        |   |                      |
| ATOM H5  | HA  | 0.09   | ! |        |   |                      |
| ATOM C20 | CT2 | -0.206 | ! | -0.23  | ! | ESP charge optimized |
| ATOM H16 | HA  | 0.09   | ! |        |   |                      |
| ATOM H17 | HA  | 0.09   | ! |        |   |                      |

|          |    |        |   |  |  |  |
|----------|----|--------|---|--|--|--|
| GROUP    |    |        | ! |  |  |  |
| ATOM C16 | CA | -0.115 | ! |  |  |  |
| ATOM H8  | HP | 0.115  | ! |  |  |  |
| GROUP    |    |        | ! |  |  |  |
| ATOM C17 | CA | -0.115 | ! |  |  |  |
| ATOM H9  | HP | 0.115  | ! |  |  |  |
| GROUP    |    |        | ! |  |  |  |
| ATOM C14 | CA | -0.115 | ! |  |  |  |
| ATOM H7  | HP | 0.115  | ! |  |  |  |
| GROUP    |    |        | ! |  |  |  |
| ATOM C12 | CA | 0.000  | ! |  |  |  |
| GROUP    |    |        | ! |  |  |  |
| ATOM C13 | CA | 0.000  | ! |  |  |  |

|          |     |        |   |  |  |  |
|----------|-----|--------|---|--|--|--|
| ! RING 2 |     |        |   |  |  |  |
| GROUP    |     |        | ! |  |  |  |
| ATOM C34 | CT3 | -0.27  | ! |  |  |  |
| ATOM H44 | HA  | 0.09   | ! |  |  |  |
| ATOM H45 | HA  | 0.09   | ! |  |  |  |
| ATOM H46 | HA  | 0.09   | ! |  |  |  |
| GROUP    |     |        | ! |  |  |  |
| ATOM C33 | CT3 | -0.27  | ! |  |  |  |
| ATOM H41 | HA  | 0.09   | ! |  |  |  |
| ATOM H42 | HA  | 0.09   | ! |  |  |  |
| ATOM H43 | HA  | 0.09   | ! |  |  |  |
| GROUP    |     |        | ! |  |  |  |
| ATOM C10 | CT  | 0.00   | ! |  |  |  |
| GROUP    |     |        | ! |  |  |  |
| ATOM C11 | CA  | -0.115 | ! |  |  |  |
| ATOM H6  | HP  | 0.115  | ! |  |  |  |
| GROUP    |     |        | ! |  |  |  |
| ATOM C8  | CA  | 0.000  | ! |  |  |  |
| GROUP    |     |        | ! |  |  |  |
| ATOM C9  | CA  | 0.000  | ! |  |  |  |

|         |    |        |   |  |  |  |
|---------|----|--------|---|--|--|--|
| !RING 3 |    |        |   |  |  |  |
| GROUP   |    |        | ! |  |  |  |
| ATOM C1 | CA | -0.115 | ! |  |  |  |
| ATOM H1 | HP | 0.115  | ! |  |  |  |

```

GROUP                                     !
ATOM C2 CA                               -0.115 !
ATOM H2 HP                                0.115 !
GROUP                                     !
ATOM C4 CA                                0.000 !

!RING 4
GROUP
ATOM C5 CT2                               -0.18 !
ATOM H3 HA                                 0.09 !
ATOM H40 HA                               0.09 !
GROUP                                     !
ATOM C6 CT2                               -0.18 !
ATOM H4 HA                                 0.09 !
ATOM H38 HA                               0.09 !

! BUTANAL PENDANT
GROUP                                     !
ATOM C21 CT2                              -0.18 !
ATOM H18 HA                                0.09 !
ATOM H19 HA                                0.09 !
GROUP                                     !
ATOM C22 CT2                              -0.18 !
ATOM H20 HA                                0.09 !
ATOM H21 HA                                0.09 !
GROUP                                     !
ATOM C23 CC                               0.55 !
ATOM O1 O                                  -0.55 !

! LINKER
GROUP                                     !
ATOM N3 NH2                              -0.47 ! -ALAD residue
ATOM H22 H                                 0.31 ! |
ATOM C24 CT2                              -0.02 ! |
ATOM H23 HA                                 0.09 ! |
ATOM H24 HA                                 0.09 ! -/
GROUP                                     !
ATOM C25 CT2                              -0.18 !
ATOM H25 HA                                 0.09 !
ATOM H26 HA                                 0.09 !
GROUP                                     !
ATOM C26 CT2                              -0.18 !
ATOM H27 HA                                 0.09 !
ATOM H28 HA                                 0.09 !
GROUP                                     !
ATOM C27 CT2                              -0.18 !
ATOM H29 HA                                 0.09 !
ATOM H30 HA                                 0.09 !
GROUP                                     !
ATOM C28 CT2                              -0.18 !
ATOM H31 HA                                 0.09 !
ATOM H32 HA                                 0.09 !
GROUP                                     !
ATOM C29 CT2                              -0.01 ! -ALAD residue

```

```

ATOM H33  HA      0.09  ! |
ATOM H34  HA      0.09  ! |
ATOM N4   NH2    -0.47  ! |
ATOM H35  H       0.31  ! _/
GROUP                                !
ATOM C30  CC      0.55  !
ATOM O2   O      -0.55  !
GROUP                                !
ATOM C31  CE1    -0.15  ! -PRPE residues
ATOM C32  CE1    -0.15  ! |
ATOM H36  HE1     0.15  ! |
ATOM H37  HE1     0.15  ! _/

```

```

BOND N1  C18 N1  C19                                !
DOUBLE N1 C15                                        !
BOND C19 H13 C19 H14 C19 H15 C18 H10 C18 H11 C18 H12 !
BOND C15 C16 C16 C17 C17 C12 C12 C13 C13 C14 C14 C15 ! RING 1 CARBONS
BOND C14 H7  C16 H8  C17 H9                        ! RING 1 Hs
BOND C12 C11 C11 C8  C8  C9  C9  C10 C10 C13      ! RING 2 CARBONS
BOND C11 H6  C10 C33 C10 C34                      ! RING 2 SUBS
BOND C34 H44 C34 H45 C34 H46 C33 H41 C33 H42 C33 H43 ! " " "
BOND C8  C1  C1  C4  C4  C3  C3  C2  C2  C9      ! RING 3 CARBONS
BOND C1  H1  C2  H2                                ! RING 3 Hs
BOND C4  C5  C5  C6  C6  C7  C7  N2  N2  C3      ! RING 4 CARBONS/N
BOND C5  H3  C5  H40 C6  H4  C6  H38 C7  H39 C7 H5 ! RING 4 Hs
BOND N2  C20 C20 H16 C20 H17 C20 C21              !
BOND C21 H18 C21 H19 C21 C22 C22 H20 C22 H21      !
BOND C22 C23 C23 N3  N3  H22 N3  C24              !
DOUBLE  C23 O1                                      !
BOND C24 H23 C24 H24 C24 C25 C25 H25 C25 H26 C25 C26 !
BOND C26 H27 C26 H28 C26 C27 C27 H29 C27 H30 C27 C28 !
BOND C28 H31 C28 H32 C28 C29 C29 H33 C29 H34 C29 N4 !
BOND N4  H35 N4  C30 C30 C31 C31 H36 C32 H37      !
DOUBLE  C30 O2  C31 C32                            !

```

```

PRES LNK1      -0.00  ! patch for linking ATTO 610 to THY C5M

```

```

GROUP                                !
ATOM 2N1  NN2B   -0.34  !
ATOM 2C6  CN3     0.17  !
ATOM 2H6  HN3     0.17  !
ATOM 2C2  CN1T    0.51  !
ATOM 2O2  ON1    -0.41  !
ATOM 2N3  NN2U   -0.46  !
ATOM 2H3  HN2     0.36  !
ATOM 2C4  CN1     0.50  !
ATOM 2O4  ON1    -0.45  !
ATOM 2C5  CN3T   -0.15  !
ATOM 2C5M CN9    -0.04  !
ATOM 2H52 HN9     0.07  !
ATOM 2H53 HN9     0.07  !

```

```

BOND 1C32  2C5M
DELETE ATOM 2H51

```

!!!!!!!!!!!!!!!!!!!!!!!!!!!!!!!!!!!!!!!!The End!!!!!!!!!!!!!!!!!!!!!!!!!!!!!!!!!!!!!!!!
